# Supplementary material for: A role for seed storage proteins in Arabidopsis seed longevity
Source: PubMed Central journal article supplement (PMC4588887; doi:10.1093/jxb/erv348), 2015-07-16
Supplement: supp_erv348_JEXPB151399_Supp_File__SH.pdf [file supp_erv348_JEXPB151399_Supp_File__SH.pdf]

Supplemental figures and tables

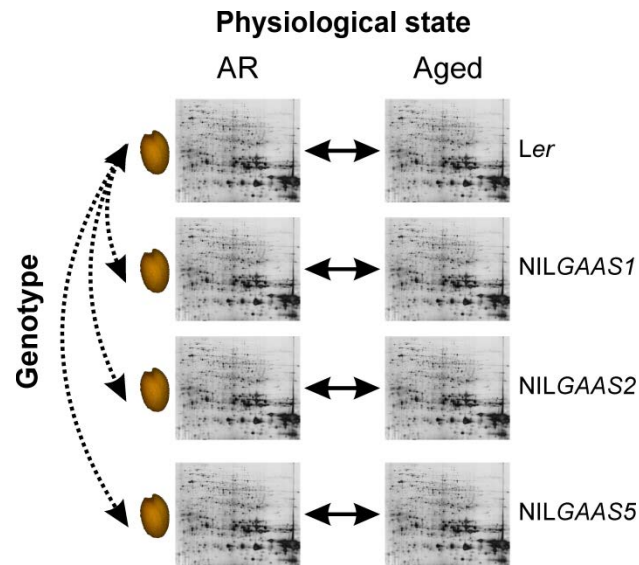

**Figure S1.** Schematic presentation of the performed experiment

Total soluble proteomes were isolated from dry seeds at two physiological states; after-ripened (AR) and aged and separated by 2D PAGE. Comparisons were made between the mentioned physiological states within the genotypes (indicated by the solid arrows); and between genotypes *Ler* and near-isogenic lines; NILGAAS1, NILGAAS2 and NILGAAS5 at the AR state (indicated by the dashed arrows).

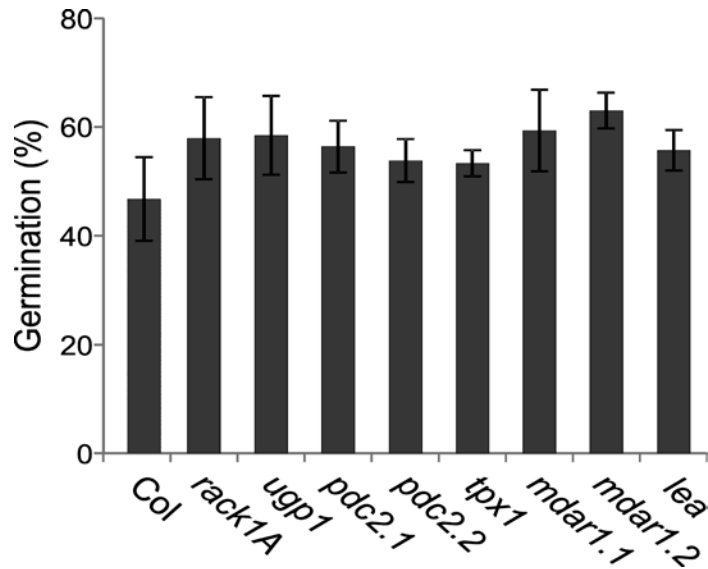

**Figure S2.** Seed longevity of T-DNA knock-out mutants after artificial aging

Seed longevity presented as germination (%) of T-DNA knock-out mutants of candidate genes was measured after 8 days of artificial aging treatment. Standard errors are calculated on four biological replicates. No significant differences between mutants and Col wild type were identified ( $P \leq 0.05$ ).

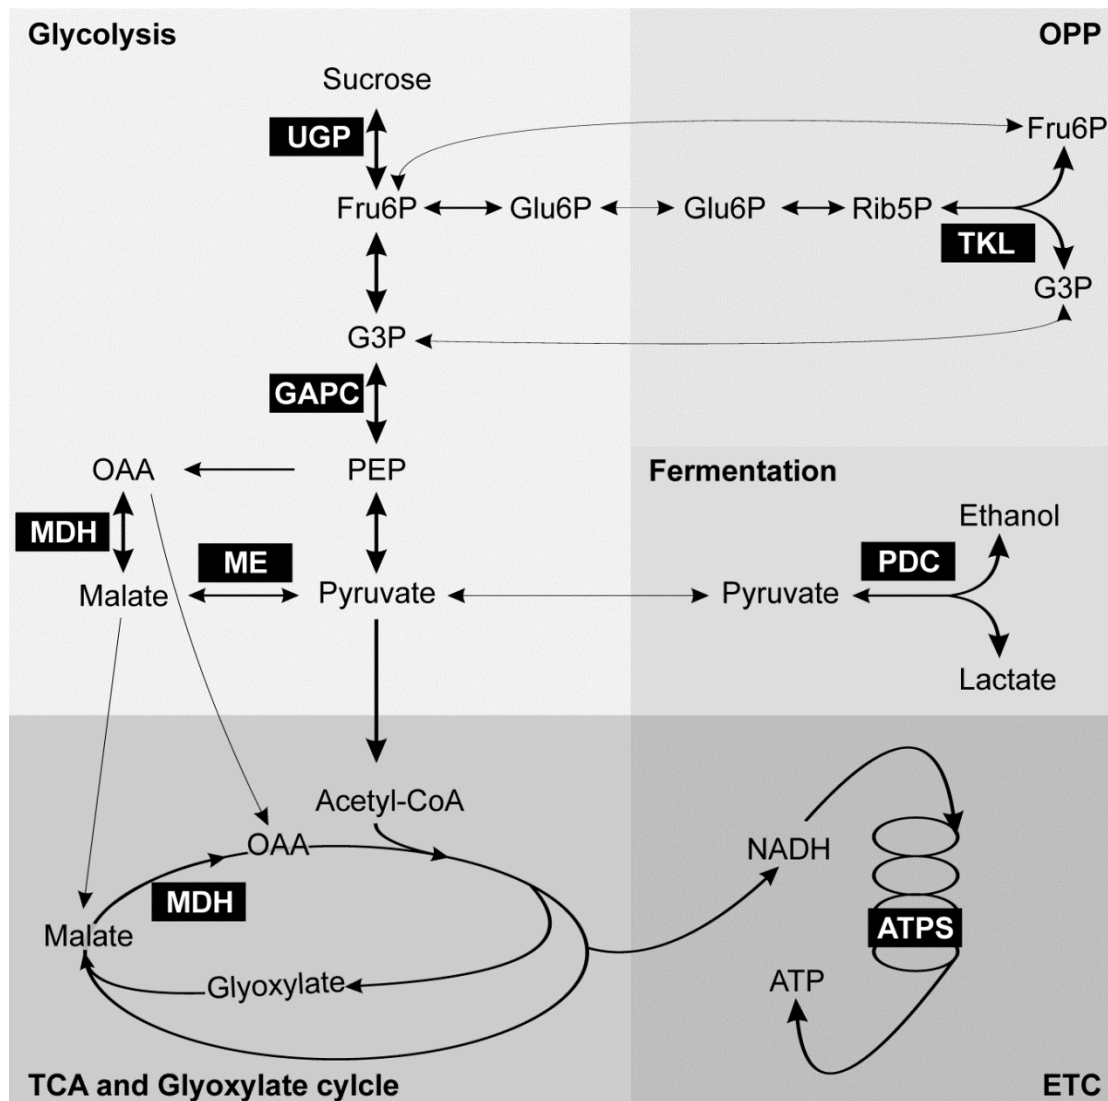

**Figure S3.** Schematic representation of energy metabolism related pathways affected during seed storage

Glycolysis, oxidative pentose phosphate (OPP), fermentation, tricarboxylic acid cycle (TCA), glyoxylate, and electron transport chain (ETC) pathways are shown. Identified enzymes are indicated in back box. UGP, UDP-1 GLUCOSE URIDYLYLTRANSFERASE; GAPC, GLYCERALDEHYDE3-P dehydrogenase C; TKL, TRANSKETOLASE; PDC, PYRUVATE DECARBOXYLASE; MDH, MALATE DEHYDROGENASE; ME, NADP-DEPENDENT MALIC ENZYME; ATPS, ATP SYNTHASE  $\beta$  chain; Fru6P, Fructose 6-phosphate; Glu6P, Glucose 6-phosphate; G3P, Glyceraldehyde 3-phosphate; PEP, Phosphoenolpyruvate; Rib5P, Ribulose 5-phosphate; OAA, Oxaloacetate.

**Table S1.** The T-DNA knock-out lines of the selected candidate genes

Details of the T-DNA knock-out lines that are tested for their role in seed longevity. For each gene the Gene ID and acronym, the T-DNA line code and the primer (left and right) information for confirming the insertion are presented in the knock-out. Homozygous T-DNA insertion lines were isolated for genes in bold.

| Gene ID          | Annotation                                       | Acronym | T-DNA line        | Insertion     | Primer                     |                         |
|------------------|--------------------------------------------------|---------|-------------------|---------------|----------------------------|-------------------------|
|                  |                                                  |         |                   |               | Forward                    | Reverse                 |
| <b>AT3G52880</b> | Monodehydroascorbate reductase1                  | MDHAR1  | SALK_034883C      | Exon          | TTAGGTGGCTCATATGAACG       | A000CAACTATCACAATGTCG   |
|                  |                                                  | MDHAR2  | SALK_145224C      | Exon          | CTGAATTCCACTCTAOCAGCTGG    | ACACAGACCGATGCATTCTTC   |
| <b>AT3G15670</b> | Late embryogenesis abundant protein              | LEA76   | SALK_052297.1455  | 1000-Promotor | GGTCTCAAACGCTCAAAAATG      | A0CATCGGGACATTTGTAGTG   |
| <b>AT3G03250</b> | UTP:glucose-1-phosphate<br>uridylyltransferase 1 | UGP1    | SALK_100183C      | Exon          | ATCATTTCATGGATGCTTTGC      | A00CAGACATCA00CAGACAC00 |
| AT5G17310        | UTP:glucose-1-phosphate<br>uridylyltransferase 2 | UGP2    | SALK_0159232550   | Exon          | TCTTTGCTCCTTGCATGAAC       | GATTTCAAGTTTAGT000GGC   |
| <b>AT5G54960</b> | Pyruvate decarboxylase 2                         | PDC21   | SALK_650_005      | Exon          | TCCTGGTGATTTCA00CTGAC      | CATGGCTTGAGCATAG00CTAG  |
|                  |                                                  | PDC22   | SALK_009521C      | Exon          | TTCAAGTTCA00CATATGGGC      | TC00CAAGCTTA00CAAAT0G   |
| <b>AT1G65980</b> | Thioredoxin-dependent peroxidase1                | TPX1    | SALK_069621.55.70 | 300-UTR3      | CTGATTTCTT0GTGAGCAAGC      | AAGCATGGGAAAAACATACC    |
| <b>AT1G18080</b> | Receptor for activated kinase1                   | RACK1A  | SALK_009403C      |               | Provided by Magbatera Genm |                         |
| AT2G15430        | RNA polymerase II                                |         | SALK_0081283020   | Exon          | ATGGATCCAGTCA00CAGACAG     | CGTTTATTTT0GTTA00GAG0G  |
| AT5G28840        | GDP-D-mannose 3',5' epimerase                    |         | SALK_0184135475   | Exon          | TTTTTCGGATCATCT0GAGTTC     | TCGATGAGTGTGTTGAAGGTG   |
| AT5G28840        | GDP-D-mannose 3',5' epimerase                    | GME     | SALK_15020840.70  | Exon          | TCACCGTGAGTGAT00CTAAC      | TGCTTGATCAACTTAGGTGG    |

**Table S2.** Protein spots that show an overlapping abundance pattern in after-ripened seeds of NILGAAS1 and NILGAAS2 in comparison with that of Ler

The table displays protein spots based on the seven comparisons. Spot ID, the gene corresponding to the protein underlying the spot, molecular weight (MW in kD) and the theoretical (Th) and experimental (Exp) isoelectric point (pI), are presented respectively. Furthermore the relative abundance (fold change) of the spots in both types of comparisons (Fig. 1; physiological state and genotype) is indicated. Positive fold changes indicate higher abundances, and negative lower abundances. Fold changes in bold indicate the is statistically significant changes. NG1 stands for NILGAAS1, NG2 for NILGAAS2 and NG5 for NILGAAS5. Spots that were identified based on comparison to the reference protein map (<http://www.seed-proteome.com>) are labelled with <sup>R</sup>. The n.i. indicates not identified.

| Spot ID              | Gene      | Protein                          | MW (kD) |       | pI   |      | Relative abundance (fold change) |             |             |     |              |             |     |  |
|----------------------|-----------|----------------------------------|---------|-------|------|------|----------------------------------|-------------|-------------|-----|--------------|-------------|-----|--|
|                      |           |                                  | Th      | Exp   | Th   | Exp  | Physiological state:             |             |             |     | Genotype AR: |             |     |  |
|                      |           |                                  |         |       |      |      | Aged vs. AR                      |             |             |     | NIL vs. Ler  |             |     |  |
|                      |           |                                  | Ler     | NG1   | NG2  | NG5  | NG1                              | NG2         | NG5         |     |              |             |     |  |
| <b>ID0678</b>        | n.i.      | n.i.                             | n.i.    | 51.13 | n.i. | 6.84 | 1.4                              | <b>-1.9</b> | <b>-2.1</b> | 1.3 | <b>-1.9</b>  | <b>-2.1</b> | 1.3 |  |
| eID0179              | AT4G28520 | Cruciferin C                     | 58.24   | 27.37 | 6.99 | 5.71 | 1.3                              | <b>1.8</b>  | <b>1.5</b>  | 1.2 | <b>1.8</b>   | <b>1.5</b>  | 1.2 |  |
|                      | AT1G03880 | Cruciferin B                     | 50.56   |       | 7.0  |      |                                  |             |             |     |              |             |     |  |
|                      | AT1G03890 | Cupin family protein             | 49.67   |       | 5.45 |      |                                  |             |             |     |              |             |     |  |
|                      | AT5G07190 | Arabidopsis thaliana seed gene 3 | 23.08   |       | 6.74 |      |                                  |             |             |     |              |             |     |  |
| ID0807               | AT4G09670 | Oxidoreductase family protein    | 39.56   | 41.25 | 5.69 | 5.69 | 1.1                              | <b>1.6</b>  | <b>1.6</b>  | 1.5 | <b>1.6</b>   | <b>1.6</b>  | 1.5 |  |
| eID0141 <sup>R</sup> | AT5G44120 | Cruciferin A                     | 52.59   | 14.51 | 7.88 | 5.86 | <b>2.5</b>                       | <b>1.5</b>  | <b>1.7</b>  | 1.6 | <b>1.5</b>   | <b>1.7</b>  | 1.6 |  |

**Table S3.** The nomenclature of seed storage proteins

Single, double and triple knock-outs lines for cruciferins and RNAi line for napins obtained from Withana-Gamage *et al.* (2013).

| Line   | Acronym    | Knock-out gene                     | Protein content             |
|--------|------------|------------------------------------|-----------------------------|
| Col    | Col        | -                                  | CRUA, CRUB, CRUC and NAPINs |
| Single | <b>aBC</b> | AT5G44120                          | CRUB, CRUC and NAPINs       |
|        | <b>AbC</b> | AT1G03880                          | CRUA, CRUC and NAPINs       |
|        | <b>ABc</b> | AT4G28520                          | CRUA, CRUB and NAPINs       |
| Double | <b>abC</b> | AT5G44120 and AT1G03880            | CRUC and NAPINs             |
|        | <b>aBc</b> | AT5G44120 and AT4G28520            | CRUB and NAPINs             |
|        | <b>Abc</b> | AT1G03880 and AT4G28520            | CRUA and NAPINs             |
| Triple | <b>abc</b> | AT5G44120, AT1G03880 and AT4G28520 | CRU- and NAPINs             |
| RNAi   | RNAi Napin | Napin gene family (5 members)      | CRUs                        |
